# Supplementary material
Source: PubMed Central journal article supplement (PMC9177734)
Supplement: NIHMS1784892-supplement-3.pdf [file NIHMS1784892-supplement-3.pdf]

|                                   | P (two-tailed) | Pearson r | R squared | P value summary |
|-----------------------------------|----------------|-----------|-----------|-----------------|
| Calories(kcal/r)                  | 0.0492         | -0.997    | 0.994     | *               |
| Caloric Intake (kcal/Body weight) | 0.946          | -0.08474  | 0.007181  | ns              |
| Body weight                       | 0.213          | 0.9445    | 0.8922    | ns              |
| % Carbohydrate                    | 0.0244         | 0.9993    | 0.9985    | *               |
| % Fat                             | 0.0103         | -0.9999   | 0.9997    | *               |
| % Protein                         | 0.2675         | 0.913     | 0.8336    | ns              |
| Carb. cal (kcal/g)                | 0.0233         | 0.9993    | 0.9987    | *               |
| Fat (kcal/g)                      | 0.0108         | -0.9999   | 0.9997    | *               |
| Prot. (kcal/g)                    | 0.2675         | 0.913     | 0.8336    | ns              |
| Monosaccharides                   | 0.2039         | -0.9492   | 0.9009    | ns              |
| Disaccharides                     | 0.0253         | 0.9992    | 0.9984    | *               |
| Polysaccharides                   | 0.0339         | 0.9986    | 0.9972    | *               |
| 18:2 Linoleic acid                | 0.097          | -0.9884   | 0.9769    | ns              |
| 18:3 Linoleic acid                | 0.0536         | -0.9965   | 0.9929    | ns              |
| Total saturated fat               | 0.0022         | -1        | 1         | **              |
| Total monounsaturated fat         | 0.0716         | -0.9937   | 0.9874    | ns              |
| Total polyunsaturated fat         | 0.0899         | -0.99     | 0.9802    | ns              |
| Ala                               | 0.2675         | 0.913     | 0.8336    | ns              |
| Arg                               | 0.2675         | 0.913     | 0.8336    | ns              |
| Asp                               | 0.2675         | 0.913     | 0.8336    | ns              |
| Cys                               | 0.2675         | 0.913     | 0.8336    | ns              |
| Glutamate                         | 0.2675         | 0.913     | 0.8336    | ns              |
| Glycine                           | 0.2675         | 0.913     | 0.8336    | ns              |
| Hist                              | 0.2675         | 0.913     | 0.8336    | ns              |
| Iso                               | 0.2675         | 0.913     | 0.8336    | ns              |
| Leu                               | 0.2675         | 0.913     | 0.8336    | ns              |
| Lys                               | 0.2675         | 0.913     | 0.8336    | ns              |
| Methionine                        | 0.2675         | 0.913     | 0.8336    | ns              |
| Phen                              | 0.2675         | 0.913     | 0.8336    | ns              |
| Prot cal                          | 0.2675         | 0.913     | 0.8336    | ns              |
| Ser                               | 0.2675         | 0.913     | 0.8336    | ns              |
| Thr                               | 0.2675         | 0.913     | 0.8336    | ns              |
| Tryp                              | 0.2675         | 0.913     | 0.8336    | ns              |
| Tyr                               | 0.2675         | 0.913     | 0.8336    | ns              |
| Val                               | 0.2675         | 0.913     | 0.8336    | ns              |
