# Supplementary material
Source: PubMed Central journal article supplement (PMC9177734)
Supplement: NIHMS1784892-supplement-4.pdf [file NIHMS1784892-supplement-4.pdf]

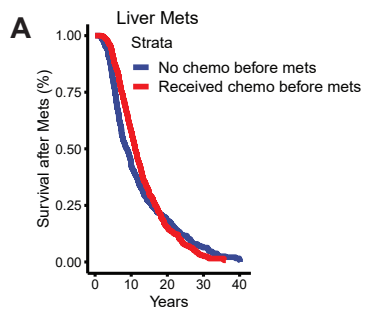

| Survival after Liver Mets  |                                 |                   |         |
|----------------------------|---------------------------------|-------------------|---------|
|                            | Median Survival, years (95% CI) | HR (95% CI)       | P-value |
| No Chemo before Mets       | 8.71 (7.76, 9.7)                | -                 | -       |
| Received Chemo before Mets | 11.11 (10.68, 11.69)            | 1.74 (1.49, 2.03) | <0.001* |

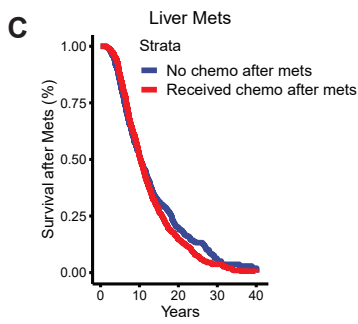

| Survival after Liver Mets |                                 |                   |         |
|---------------------------|---------------------------------|-------------------|---------|
|                           | Median Survival, years (95% CI) | HR (95% CI)       | P-value |
| No Chemo after Mets       | 10.3 (9.42, 11.5)               | -                 | -       |
| Received Chemo after Mets | 10.28 (9.79, 10.87)             | 1.07 (0.95, 1.22) | 0.26    |

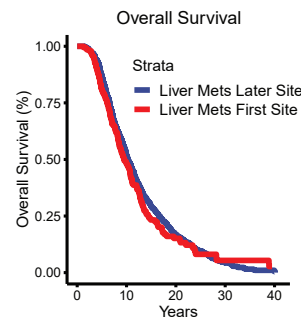

| Overall Survival: Liver Mets Later Site vs. First Site |                                 |                  |         |
|--------------------------------------------------------|---------------------------------|------------------|---------|
|                                                        | Median Survival, years (95% CI) | HR (95% CI)      | P-value |
| Liver Mets Later Site                                  | 10.3 (9.9, 10.94)               | -                | -       |
| Liver Mets First Site                                  | 9.53 (8.52, 11.08)              | 1.08 (0.9, 1.29) | 0.41    |

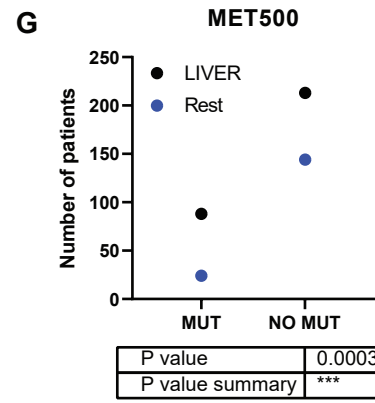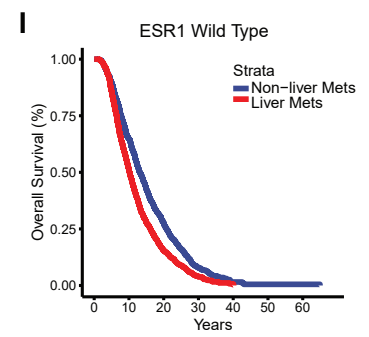

| Overall Survival: ESR1 Wild Type |                                 |                  |         |
|----------------------------------|---------------------------------|------------------|---------|
|                                  | Median Survival, years (95% CI) | HR (95% CI)      | P-value |
| Non-Liver Metastasis             | 13.17 (12.49, 13.95)            | -                | -       |
| Liver Metastasis                 | 10.15 (9.78, 10.69)             | 1.47 (1.35, 1.6) | <0.001* |

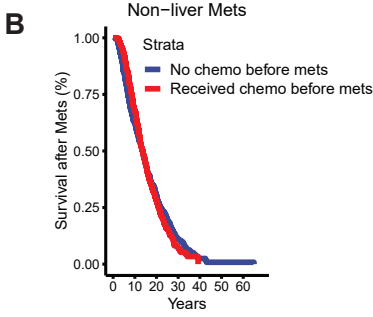

| Survival after Non-Liver Mets |                                 |                   |         |
|-------------------------------|---------------------------------|-------------------|---------|
|                               | Median Survival, years (95% CI) | HR (95% CI)       | P-value |
| No Chemo before Mets          | 13.48 (12.24, 14.67)            | -                 | -       |
| Received Chemo before Mets    | 13.66 (12.78, 14.62)            | 1.72 (1.48, 1.99) | <0.001* |

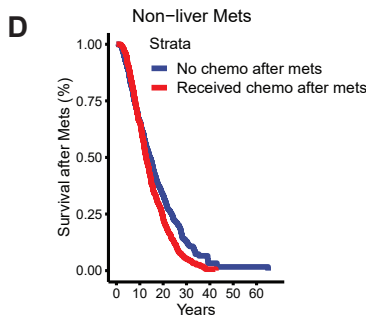

| Survival after Non-Liver Mets |                                 |                   |         |
|-------------------------------|---------------------------------|-------------------|---------|
|                               | Median Survival, years (95% CI) | HR (95% CI)       | P-value |
| No Chemo after Mets           | 14.51 (13.39, 15.52)            | -                 | -       |
| Received Chemo after Mets     | 12.69 (12.02, 13.77)            | 1.31 (1.15, 1.48) | <0.001* |

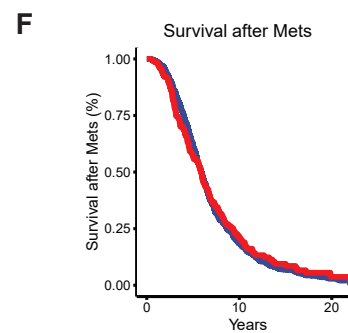

| Survival after Mets: Liver Mets Later Site vs. First Site |                                 |                   |         |
|-----------------------------------------------------------|---------------------------------|-------------------|---------|
|                                                           | Median Survival, years (95% CI) | HR (95% CI)       | P-value |
| Liver Mets Later Site                                     | 5.91 (5.68, 6.14)               | -                 | -       |
| Liver Mets First Site                                     | 5.85 (5.04, 6.67)               | 0.97 (0.81, 1.16) | 0.72    |

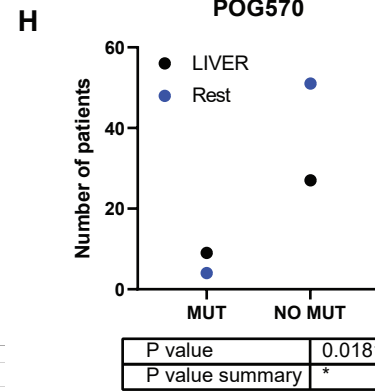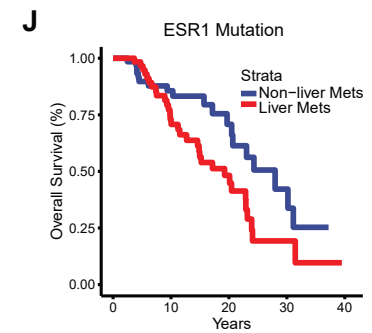

| Overall Survival: ESR1 Mutation |                                 |                  |         |
|---------------------------------|---------------------------------|------------------|---------|
|                                 | Median Survival, years (95% CI) | HR (95% CI)      | P-value |
| Non-Liver Metastasis            | 27.97 (20.66, NA)               | -                | -       |
| Liver Metastasis                | 19.25 (14.58, 23.92)            | 1.63 (0.9, 2.94) | 0.1     |
