# Supplementary material
Source: PubMed Central journal article supplement (PMC9177734)
Supplement: NIHMS1784892-supplement-5.pdf [file NIHMS1784892-supplement-5.pdf]

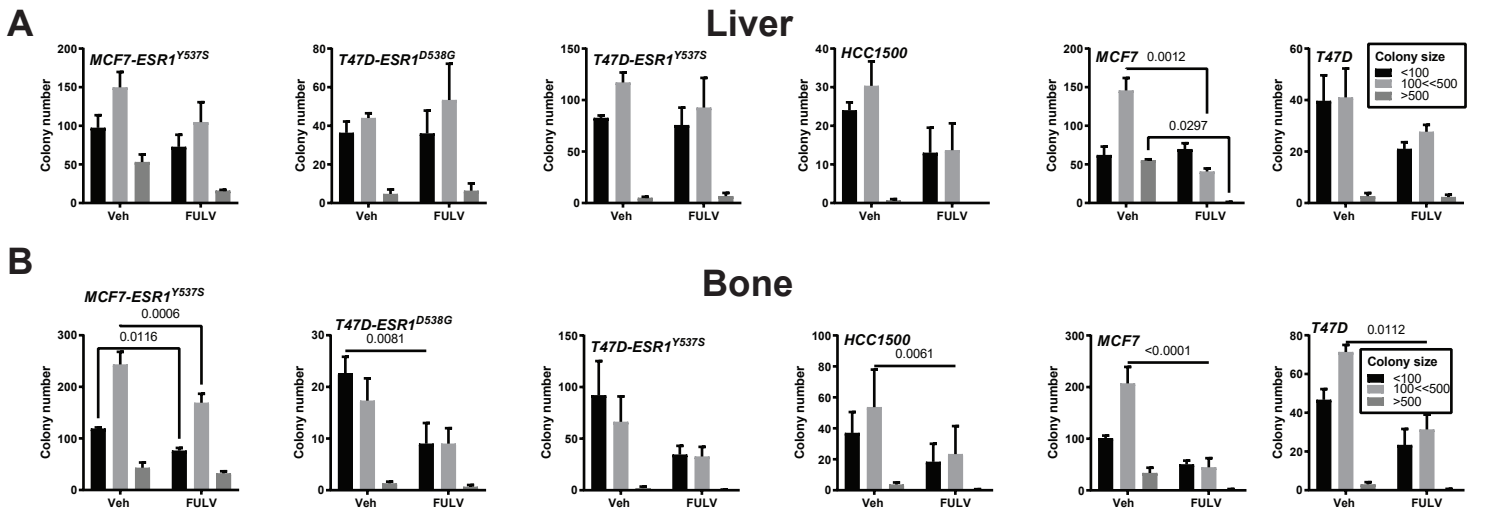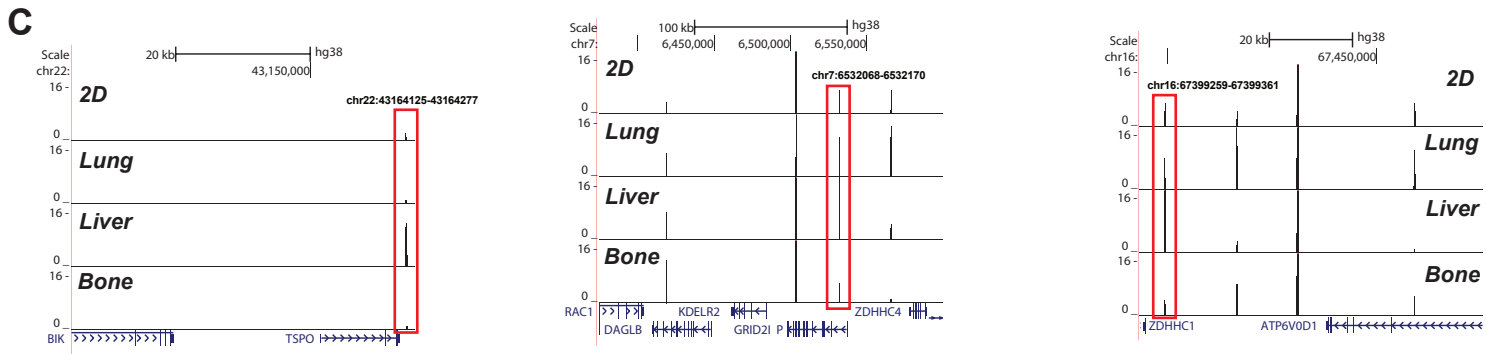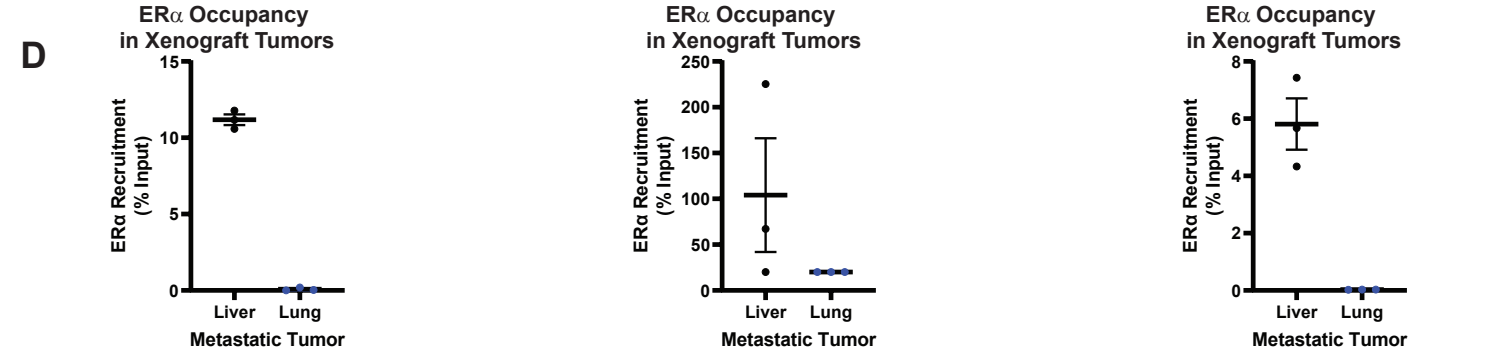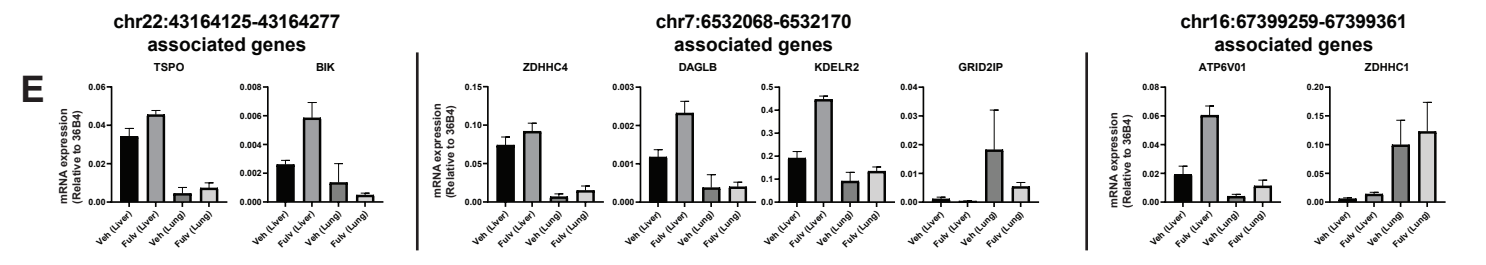

Supplementary Figure 2
