# Supplementary material
Source: PubMed Central journal article supplement (PMC9177734)
Supplement: NIHMS1784892-supplement-6.pdf [file NIHMS1784892-supplement-6.pdf]

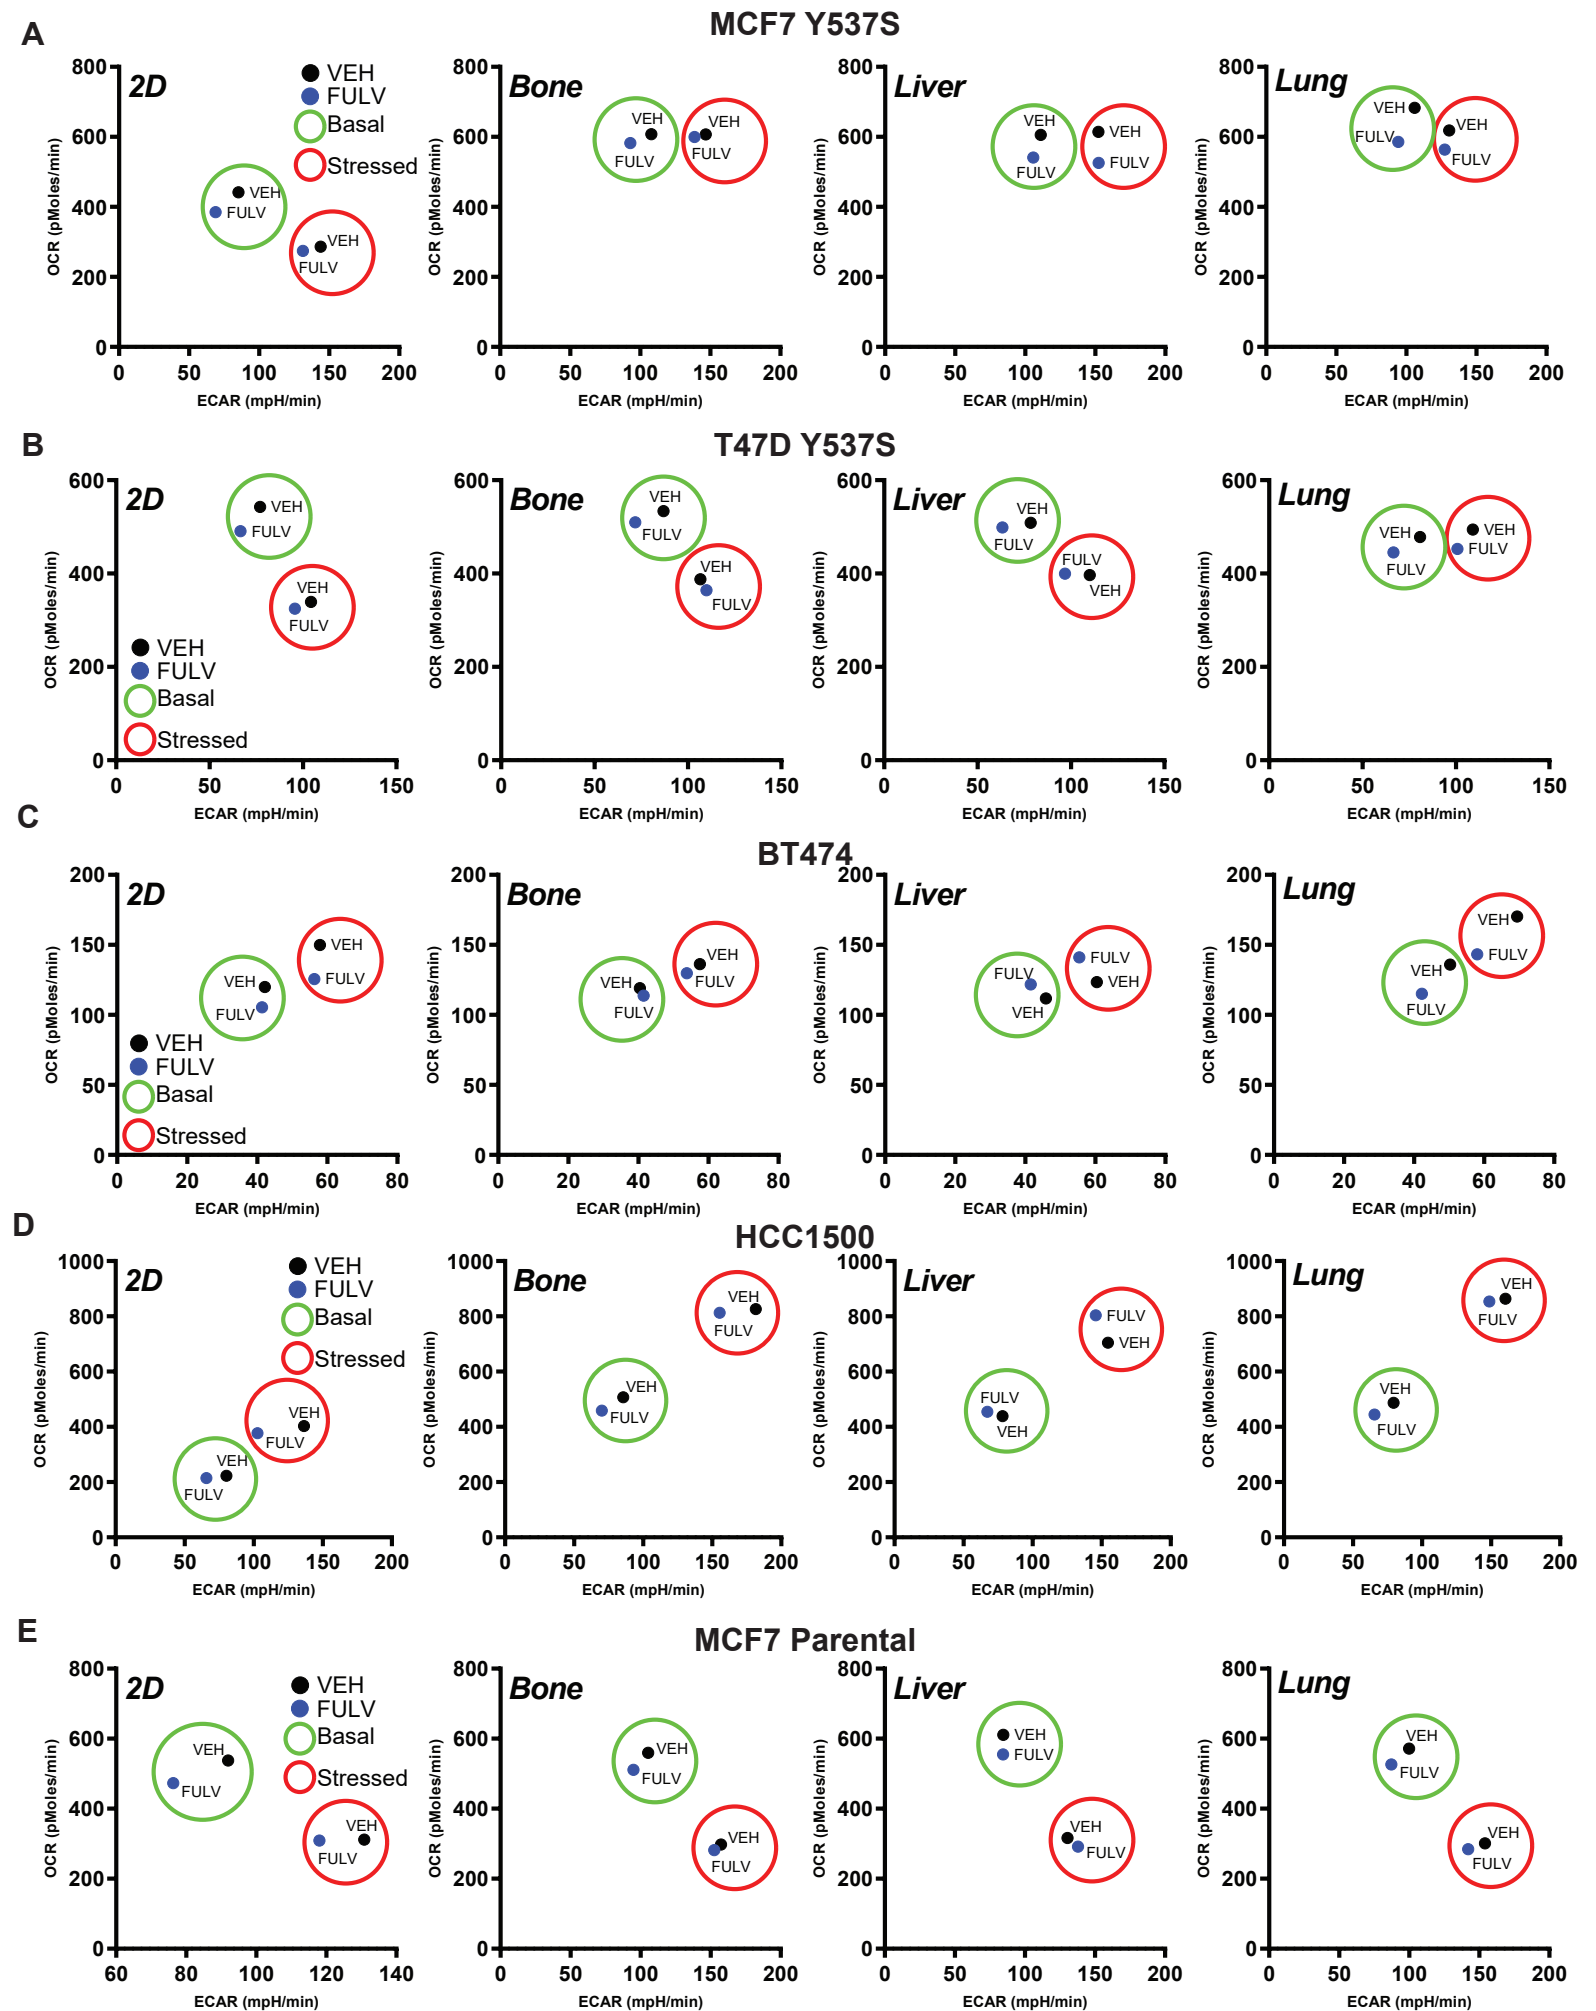

Supplementary Figure 3
