# Supplementary material
Source: PubMed Central journal article supplement (PMC9177734)

# Liver

**A**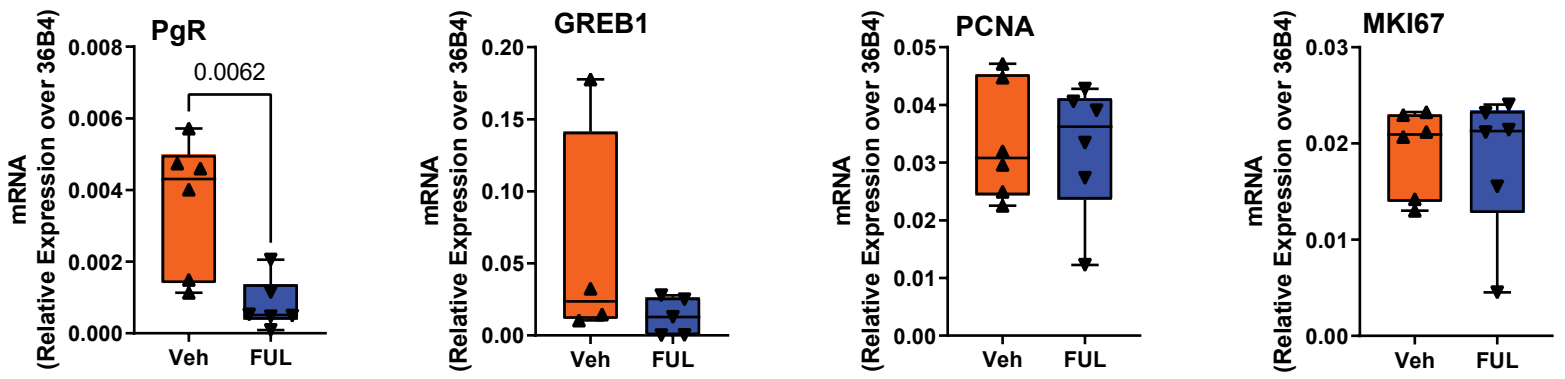**B**

# Lung

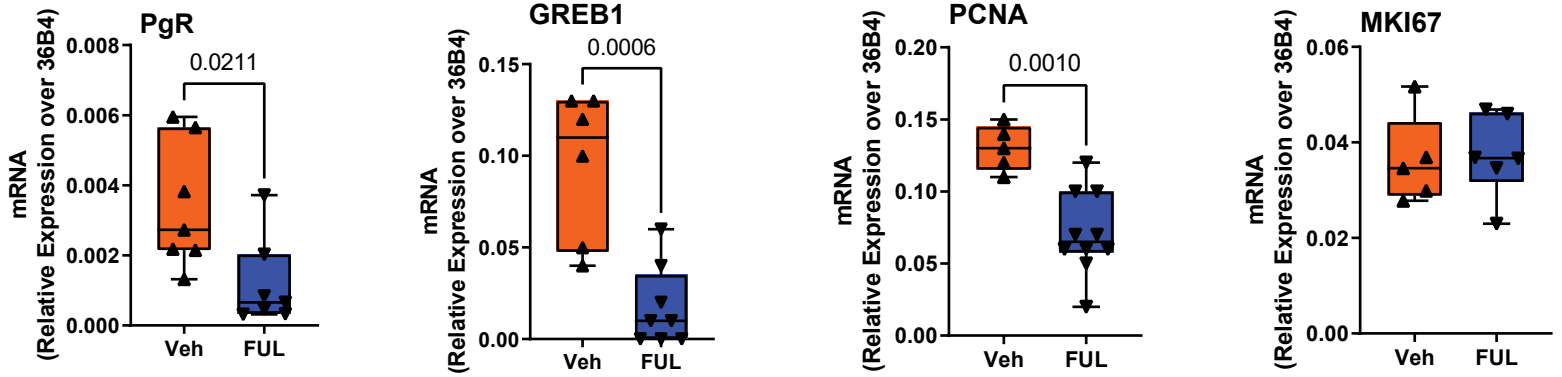**C**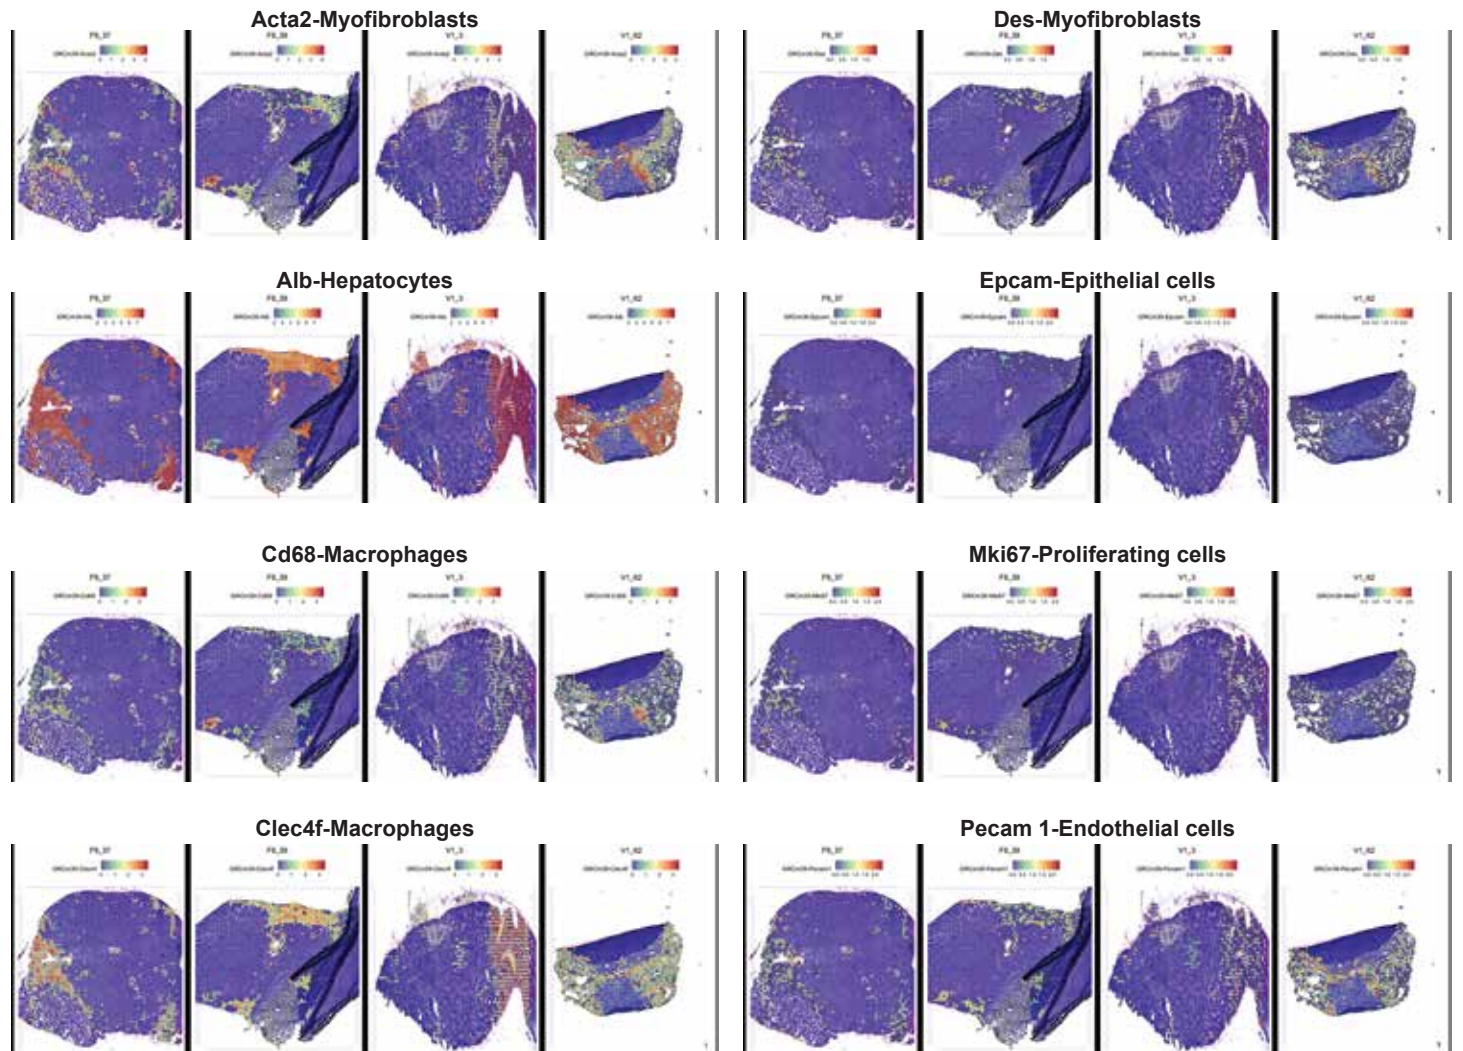

Supplement: NIHMS1784892-supplement-7.pdf [file NIHMS1784892-supplement-7.pdf]
