# Supplementary material
Source: PubMed Central journal article supplement (PMC9177734)

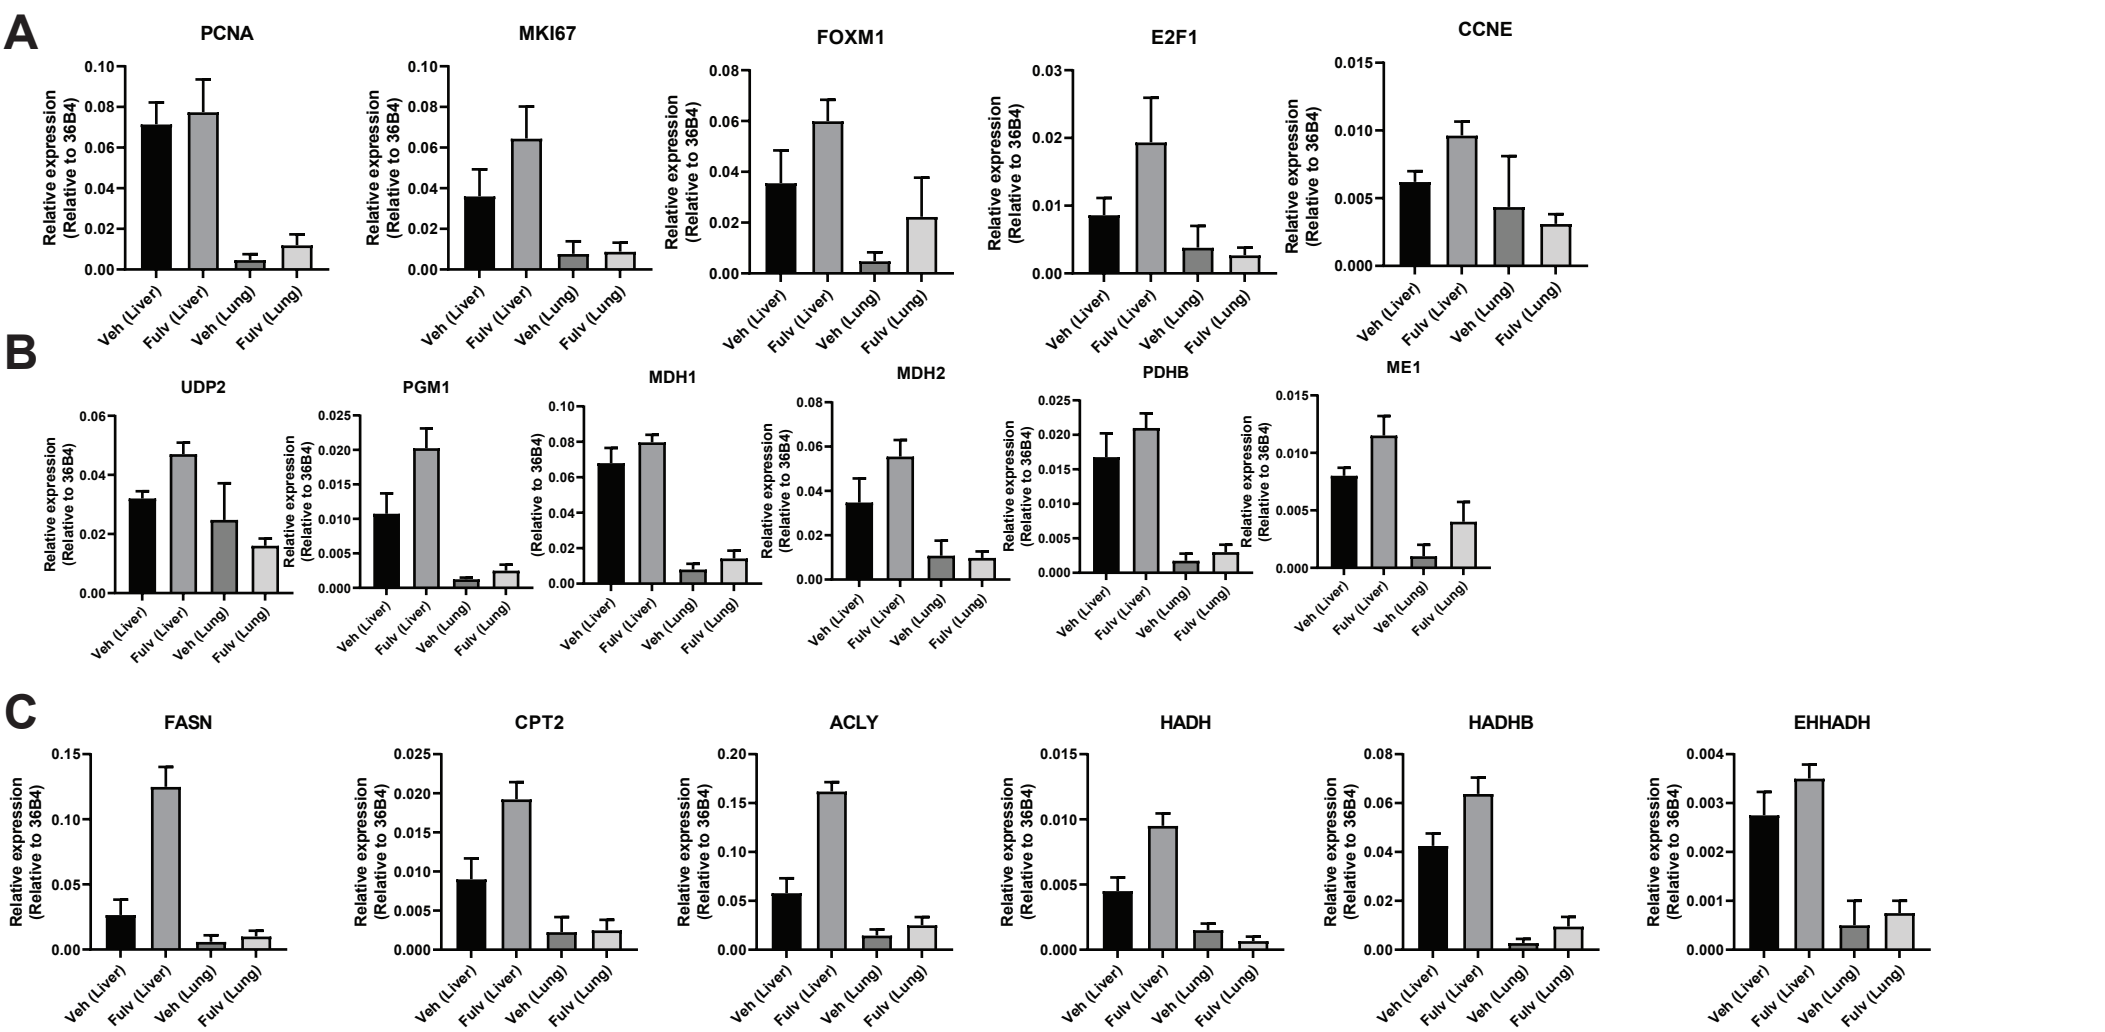

Supplement: NIHMS1784892-supplement-8.pdf [file NIHMS1784892-supplement-8.pdf]
